# Supplementary material
Source: Research Square preprint supplement (doi:10.21203/rs.3.rs-9632924/v1)
Supplement: Supplementary file 1 [file 8c1a32dfb31ae6b9a10268ff.docx]

# Supplementary Materials

## Qualitative Study: Environmental Capacity Building in Sports Clubs (Iraq)

# 1. Semi-Structured Interview Guide

## 1.1 Introduction to Participants

At the beginning of each interview, participants were informed about:

- The aim of the study (exploring environmental capacity building in sports clubs and its role in public health)
- Confidentiality and anonymity of responses
- Voluntary participation and right to withdraw
- Audio recording with consent

## 1.2 Core Interview Questions

### Section A: General Understanding

1. In your opinion, how do you define environmental capacity building in sports clubs?
2. What role do sports clubs play in promoting public health in your context?

### Section B: Infrastructure and Environment

1. How do facilities and physical infrastructure in sports clubs influence physical activity participation?
2. What is your assessment of current sports infrastructure (e.g., parks, gyms, walking paths) in your region?
3. How important are green spaces and safe environments for promoting health in clubs?

### Section C: Organizational Capacity

1. What organizational factors influence the effectiveness of health promotion in sports clubs?
2. How do managers and coaches contribute to environmental capacity building?

### Section D: Access and Motivation

1. What barriers limit participation in sports and physical activity in your community?
2. What strategies can improve motivation and access to sports facilities?
3. How do cultural and economic factors affect participation?

### Section E: Policy and Institutional Support

1. What is the role of government and sports federations in supporting health-promoting sports clubs?
2. How can national or local policies improve environmental capacity building?

### Section F: Suggestions and Improvements

1. What recommendations do you have to improve sports clubs as health-promoting environments?

## 1.3 Closing Statement

Participants were thanked for their time and contributions. Contact information for follow-up clarification was optionally collected.

# 2. Coding Framework and Thematic Analysis Structure

## 2.1 Analytical Approach

Data were analyzed using thematic analysis following Braun and Clarke’s six-step approach. Coding was conducted manually and reviewed by two researchers to ensure consistency.

## 2.2 Final Themes and Sub-Themes

### Theme 1: Active Environment Design

Sub-themes:

- Accessibility and connectivity of active transport routes
- Quality and availability of green spaces
- Supportive infrastructure (lighting, benches, signage, public equipment)

Codes:

- pedestrian and cycling network availability
- safe walking paths
- park accessibility
- lighting in sports areas
- public exercise equipment

### Theme 2: Facilitating Access and Motivation

Sub-themes:

- Financial and cultural barriers
- Incentive-based participation strategies
- Awareness and educational campaigns
- Social and community engagement

Codes:

- cost of access to facilities
- cultural constraints on participation
- health awareness programs
- group challenges
- subsidies and discounts

### Theme 3: Institutional and Policy Support

Sub-themes:

- National and local sports policies
- Inter-organizational collaboration
- Infrastructure investment and budgeting
- Security and governance of sports environments

Codes:

- government support for sports clubs
- inter-ministerial cooperation
- funding allocation for facilities
- sports club governance
- public-private partnerships

## 2.3 Example of Code Development Process

Raw statement: > “Financial, social, and cultural barriers reduce participation in physical activity.”

Initial codes:

- financial barriers
- social barriers
- cultural barriers
- low awareness of physical activity benefits

Sub-theme:

- barriers to access and participation

Theme:

- Facilitating Access and Motivation

## 2.4 Trustworthiness Measures

- Credibility: triangulation and member checking
- Dependability: audit trail and peer review of coding
- Confirmability: use of raw excerpts and structured coding matrix
- Transferability: thick description of context and participants

# 3. Notes for Peer Review

- All participant identifiers have been anonymized (P1–P20)
- Data reflect semi-structured interviews conducted in Iraq (2025–2026)
- Analysis followed established qualitative research standards (COREQ guidelines).
